# Supplementary material for: β-asarone induces viability and angiogenesis and suppresses apoptosis of human vascular endothelial cells after ischemic stroke by upregulating vascular endothelial growth factor A
Source: PeerJ. 2024 Jun 27;12:e17534. doi: 10.7717/peerj.17534 (PMC11214739; doi:10.7717/peerj.17534)
Supplement: Supplemental Information 2 [file peerj-12-17534-s002.xlsx]

## Sheet: Sheet1
ITEM TO CHECK	IMPORTANCE	CHECKLIST
EXPERIMENTAL DESIGN
Deﬁnition of experimental and control groups	E	Animal grouping Line144-159 and Cell treatment Line 210-215
Number within each group	E	Animal grouping Line151
Assay carried out by core lab or investigator's lab?	D	Animals Line103
Acknowledgement of authors'contributions	D	Author Contributions Line 497-500
SAMPLE
Description	E	Animal grouping Line144-159 and Cell treatment Line 210-215
Volume/mass of sample processed	D	Animal grouping Line154 and Cell treatment Line 213
Microdissection or macrodissection	E	TTC staining Line170,H&E staining Line187, and Spheroid-based angiogenesis assay Line244
Processing procedure	E	Animal grouping Line144-159 and Cell treatment Line 210-215
If frozen - how and how quickly?	E	Treatment of Rats Line166
If ﬁxed - with what, how quickly?	E	H&E staining Line178
Sample storage conditions and duration (especially for FFPE samples)	E	Treatment of Rats Line166
NUCLEIC ACID EXTRACTION
Procedure and/or instrumentation	E	RT-qPCR Line217-218
Name of kit and details of any modiﬁcations	E	RT-qPCR Line217-218
Source of additional reagents used	D	RT-qPCR Line217-218
Details of DNase or RNAse treatment	E	RT-qPCR Line220
Contamination assessment (DNA or RNA)	E	RT-qPCR Line218-220
Nucleic acid quantiﬁcation	E	RT-qPCR Line 226-227
Instrument and method	E	RT-qPCR Line218-220
Purity (A260/A280)	D	RT-qPCR Line220-221
Yield	D	RT-qPCR Line222
RNA integrity method/instrument	E	RT-qPCR Line223-225
RIN/RQI or Cq of 3' and 5' transcripts	E	RT-qPCR Line223-225
Electrophoresis traces	D	RT-qPCR Line223
Inhibition testing (Cq dilutions, spike or other)	E	N
REVERSE TRANSCRIPTION
Complete reaction conditions	E	RT-qPCR Line232-233
Amount of RNA and reaction volume	E	RT-qPCR Line229
Priming oligonucleotide (if using GSP) and concentration	E	RT-qPCR Line230
Reverse transcriptase and concentration	E	RT-qPCR Line231
Temperature and time	E	RT-qPCR Line230
Manufacturer of reagents and catalogue numbers	D	RT-qPCR Line228
Cqs with and without RT	D*	N
Storage conditions of cDNA	D	RT-qPCR Line233
qPCR TARGET INFORMATION
If multiplex, efﬁciency and LOD of each assay.	E	Yes
Sequence accession number	E	RT-qPCR Line244
Location of amplicon	D	RT-qPCR Line244
Amplicon length	E	RT-qPCR Line244
In silico speciﬁcity screen (BLAST, etc) Pseudogenes, retropseudogenes or other homologs? Sequence alignment	E	RT-qPCR Line244
	D	N
	D	N
Secondary structure analysis of amplicon	D	N
Location of each primer by exon or intron (if applicable)	E	RT-qPCR Line244
What splice variants are targeted?	E	N
qPCR OLIGONUCLEOTIDES
Primer sequences	E	RT-qPCR Line244-248
RTPrimerDB Identiﬁcation Number	D	N
Probe sequences	D**	N
Location and identity of any modiﬁcations	E	RT-qPCR Line244-248
Manufacturer of oligonucleotides	D	N
Puriﬁcation method	D	RT-qPCR Line244
qPCR PROTOCOL
Complete reaction conditions	E	RT-qPCR Line239-240
Reaction volume and amount of cDNA/DNA	E	RT-qPCRLine238
Primer, (probe), Mg++ and dNTP concentrations	E	RT-qPCR Line237-238
Polymerase identity and concentration	E	RT-qPCRLine237-238
Buffer/kit identity and manufacturer	E	RT-qPCR Line234-238
Exact chemical constitution of the buffer	D	RT-qPCR Line236-238
Additives (SYBR Green I, DMSO, etc.)	E	RT-qPCR Line237-238
Manufacturer of plates/tubes and catalog number	D	RT-qPCR Line234-235
Complete thermocycling parameters	E	RT-qPCR Line239-241
Reaction setup (manual/robotic)	D	RT-qPCR Line239-241
Manufacturer of qPCR instrument	E	RT-qPCR Line235
qPCR VALIDATION		Line
Evidence of optimisation (from gradients)	D	RT-qPCR Line 251
Speciﬁcity (gel, sequence, melt, or digest)	E	RT-qPCR Line 248
For SYBR Green I, Cq of the NTC	E	N
Standard curves with slope and y-intercept	E	RT-qPCR Line 248-249
PCR efﬁciency calculated from slope	E	RT-qPCR Line 248-249
Conﬁdence interval for PCR efﬁciency or standard error	D	N
r2 of standard curve	E	RT-qPCR Line 248-249
Linear dynamic range	E	RT-qPCR Line 248-249
Cq variation at lower limit	E	RT-qPCR Line 248-249
Conﬁdence intervals throughout range	D	N
Evidence for limit of detection	E	RT-qPCR Line 248-249
If multiplex, efﬁciency and LOD of each assay.	E	RT-qPCR Line 248-249
DATA ANALYSIS
qPCR analysis program (source, version)	E	RT-qPCR Line235
Cq method determination	E	RT-qPCR Line250
Outlier identiﬁcation and disposition	E	RT-qPCR Line250
Results of NTCs	E	RT-qPCR Line250
Justiﬁcation of number and choice of reference genes	E	RT-qPCR Line251-252
Description of normalisation method	E	RT-qPCR Line251-252
Number and concordance of biological replicates	D	RT-qPCR Line252-253
Number and stage (RT or qPCR) of technical replicates	E	RT-qPCR Line252-253
Repeatability (intra-assay variation)	E	RT-qPCR Line251
Reproducibility (inter-assay variation, %CV)	D	N
Power analysis	D	Statistical Analysis Line295
Statistical methods for result signiﬁcance	E	Statistical Analysis Line292-296
Software (source, version)	E	Statistical Analysis Line293-294
Cq or raw data submission using RDML	D	N
Table 1. MIQE checklist for authors, reviewers and editors. All essential information (E) must be submitted with the manuscript. Desirable information (D) should be submitted if available. If using primers obtained from RTPrimerDB, information on qPCR target, oligonucleotides, protocols and validation is available from that source.
*: Assessing the absence of DNA using a no RT assay is essential when ﬁrst extracting RNA. Once the sample has been validated as RDNA-free, inclusion of a no-RT control is desirable, but no longer essential.
**: Disclosure of the probe sequence is highly desirable and strongly encouraged. However, since not all commercial pre-designed assay vendors provide this information, it cannot be an essential requirement. Use of such assays is advised against.
